# Supplementary material for: Oxygen vacancy-engineered Fe2O3 nanocubes via a task-specific ionic liquid for electrocatalytic N2 fixation
Source: Royal Society of Chemistry journal article supplement (doi:10.1039/c9cc03221e), 2019-01-01
Supplement: c9cc03221e1.pdf [file c9cc03221e1.pdf]

**Electronic Supplementary Information (ESI)**

**Oxygen Vacancy-Engineered Fe<sub>2</sub>O<sub>3</sub> Nanocubes *via* a Task-Specific  
Ionic Liquid for Electrocatalytic N<sub>2</sub> Fixation**

Chenyun Zhang, Shuai Liu, Tingting Chen, Zhonghao Li,\* Jingcheng Hao

Key Laboratory of Colloid and Interface Chemistry, Ministry of Education, Shandong

University, Jinan, 250100, P. R. China, E-mail: zhonghaoli@sdu.edu.cn

## Experimental Section

### Chemical and materials

Hydrazine monohydrate ( $\text{N}_2\text{H}_4\cdot\text{H}_2\text{O}$ , purity 98.0%), salicylic acid ( $\text{C}_7\text{H}_6\text{O}_3$ ) as well as octylamine ( $\text{C}_8\text{H}_{17}\text{NH}_2$ ) (molecular purity  $\geq 99\%$ ) were purchased from Aladdin Chemistry Co., Ltd. Formic acid ( $\text{HCOOH}$ , purity 98%), hydrated iron (III) chloride ( $\text{FeCl}_3\cdot 6\text{H}_2\text{O}$ , purity  $\geq 98\%$ ), potassium hydroxide ( $\text{KOH}$ , purity  $\geq 96\%$ ), sodium sulfate ( $\text{Na}_2\text{SO}_4$ , purity  $\geq 96\%$ ), sodium hydroxide ( $\text{NaOH}$ , purity  $\geq 96\%$ ), ammonium chloride ( $\text{NH}_4\text{Cl}$ , purity  $\geq 96\%$ ), hydrochloric acid ( $\text{HCl}$ , 36~38%), ethanol ( $\text{C}_2\text{H}_5\text{OH}$ , purity  $\geq 99.7\%$ ), sulfuric acid ( $\text{H}_2\text{SO}_4$ , 96~98%), *p*-dimethylaminobenzaldehyde ( $\text{C}_9\text{H}_{11}\text{NO}$ , purity  $\geq 98.0\%$ ), trisodium citrate dehydrate ( $\text{C}_6\text{H}_5\text{Na}_3\text{O}_7\cdot 2\text{H}_2\text{O}$ , purity  $\geq 99\%$ ) were obtained from Sinopharm Chemical Reagent Co., Ltd. Carbon cloth was gotten from Changsha Lyrun Material Co., Ltd. Nafion solution, Nafion 211 film and sodium nitroferricyanide dehydrate ( $\text{C}_5\text{FeN}_6\text{Na}_2\text{O}\cdot 2\text{H}_2\text{O}$ , purity  $\geq 99\%$ ) were purchased from Sigma-Aldrich. Argon ( $\text{Ar}$ , purity 99.999%) and nitrogen ( $\text{N}_2$ , purity 99.999%) were obtained from Jinan Deyang Special gas Co., Ltd.  $^{15}\text{N}_2$  gas (purity 99%) in cylinder was obtained from Wuhan Newradar Special Gas Co., Ltd. Sodium hypochlorite solution ( $\text{NaClO}$ , available chlorine 4.0%) was bought from Shanghai Macklin Biochemical Co., Ltd.

### Preparation of ionic liquid (*n*-octylammonium formate, OAF)

25.85 g (0.2 mol) *n*-octylamine was added into a flask under vigorous stirring in an ice bath. Then, 9.20 g (0.2 mol)  $\text{HCOOH}$  was added dropwise to the flask until it became a white solid. The synthesized OAF was kept in a vacuum oven, mp 34 °C.

### **Synthesis of Fe<sub>2</sub>O<sub>3</sub> in OAF or in water**

In a typical procedure, 30 mg ( $1.1 \times 10^{-4}$  mol) FeCl<sub>3</sub>·6H<sub>2</sub>O was added to 4 g (0.023 mol) OAF in teflon-lined stainless autoclave, which was held at 180 °C for 12 h. Then the autoclave was naturally cooled to ambient temperature after reaction. The obtained materials were washed using water as well as ethanol for four times, respectively. The synthesized product was then placed in a vacuum oven for 12 h at room temperature. Solid red powder was denoted as Fe<sub>2</sub>O<sub>3</sub>-IL. For comparison, synthesis of Fe<sub>2</sub>O<sub>3</sub> in water was carried out using the similar method (denoted as Fe<sub>2</sub>O<sub>3</sub>-H<sub>2</sub>O).

### **Material Characterization**

Transmission electron microscopy (TEM) characterization was tested on a JEM 1400 TEM. X-ray diffraction (XRD) characterization was collected on Bruker D8A A25 X-ray Diffractometer. Energy-dispersive X-ray analysis (EDX) as well as EDX mapping were performed on OXFORD-instruments X-MaxN. X-ray photoelectron spectroscopy (XPS) measurements were conducted with a photoelectron spectrometer ESCALAB 250 XI. The photoluminescence spectroscopy (PLS) was measured by FLS 980 fluorescence spectrometer. UV-Vis spectra were operated using a SHIMADZU UV-2600 UV-Vis spectrophotometer. Fourier transformed infrared (FTIR) spectra were performed with Thermo Nicolet iS50 FT-IR. <sup>1</sup>H NMR experiments were performed on an Ascend400 spectrometer (400 MHz).

### **Electrochemical measurements**

CHI model 760E electrochemical workstation was applied to measure the

electrochemical performance. Carbon cloth modified with  $\text{Fe}_2\text{O}_3$  catalyst acted as working electrode, while Ag/AgCl electrode was employed as the reference electrode and graphite rod was used as the counter electrode.  $\text{N}_2$  was prepurified by passing successively through acid solution (1 mM  $\text{H}_2\text{SO}_4$ ) trap, distilled water trap and a molecular sieves column to remove any  $\text{NO}_x$  and  $\text{NH}_3$  contamination before use.<sup>1</sup>  $\text{N}_2$  electrochemical reduction was carried out in 0.1 M KOH or 0.1 M  $\text{Na}_2\text{SO}_4$  solution with saturated nitrogen with respect to the reversible hydrogen electrode (RHE) at room temperature under atmospheric pressure. An absorber containing 0.001 M  $\text{H}_2\text{SO}_4$  was connected to the alkaline electrolytic cell to avoid the overflow of ammonia from alkaline electrolyte, and the ammonia yield was the sum in the electrolyte and absorber.  $\text{N}_2$  was purged into the KOH or  $\text{Na}_2\text{SO}_4$  solution for at least 30 min to remove residual air. The chronoamperometric test was performed at applied potentials for 2 h. The electrochemical impedance spectroscopy (EIS) measurements were carried out with 5 mV of alternating voltage. The double-layer capacitance ( $C_{dl}$ ) of iron oxide catalysts were offered by cyclic voltammetry (CV), measuring the double-layer capacitance from 0.1 to 0.2 V (vs. RHE) with the scanning rates ranging from 10 to 100  $\text{mV s}^{-1}$ .

Working electrode was prepared as follows. Firstly, 5.0 mg  $\text{Fe}_2\text{O}_3$  and 40  $\mu\text{L}$  5% Nafion solution were dispersed in 1000  $\mu\text{L}$  deionized water with ultrasonication for 0.5 h. Secondly, the 100  $\mu\text{L}$  catalyst dispersion was coated on the 1  $\text{cm}^2$  carbon cloth (the mass loading of 0.5  $\text{mg cm}^{-2}$ ).

### **Determination of $\text{NH}_3$**

The detection of  $\text{NH}_3$  was made by ultraviolet spectrophotometry using salicylic acid.<sup>2</sup> 2 mL electrolyte or absorbing solution was obtained from the cathodic chamber or absorber. Then, the solution was mixed with 2 mL of 1 mol L<sup>-1</sup> NaOH with sodium citrate (5 wt%) as well as salicylic acid (5 wt%). Finally, 1 mL of 0.05 mol L<sup>-1</sup> NaClO as well as 0.2 mL C<sub>5</sub>FeN<sub>6</sub>Na<sub>2</sub>O (1 wt%) were added to the above solution. Absorbance measurements were carried out at  $\lambda = 655$  nm. The concentration-absorbance curve was measured by applying the standard  $\text{NH}_4\text{Cl}$  solution with  $\text{NH}_4^+$  concentrations with 0.0, 0.2, 0.4, 1.0, 2.0, 4.0, 6.0  $\mu\text{g mL}^{-1}$ . The fitting curve offered a linear relation of absorbance value under different  $\text{NH}_3$  concentration. The  $\text{NH}_3$  concentration was obtained from the calibration curve.

#### **Determination of $\text{N}_2\text{H}_4$**

$\text{N}_2\text{H}_4$  production was obtained using the Watt and Chrisp method.<sup>2</sup> Mixing of para-(dimethylamino) benzaldehyde (0.599 g), HCl (12 mol L<sup>-1</sup>, 3 mL) and ethanol (30 mL) obtained a color reagent. Concentration of  $\text{N}_2\text{H}_4$  was determined as follows. 2 mL of the electrolyte after electrolysis was mixed with 2 mL of color reagent. The absorbance of solution occurred at 455 nm. The concentration-absorbance curve was adjusted with a series of hydrazine hydrate solution (0.0, 0.2, 0.5, 1.0, 2.0, 2.5  $\mu\text{g mL}^{-1}$ ). The fitting curve displayed a linear relationship of absorbance with the  $\text{N}_2\text{H}_4$  concentration.

#### **Determination of $\text{NH}_3$ formation rate**

$$V_{\text{NH}_3} = [\text{NH}_3] \times V / t / m_{\text{cat}}$$

Where

[NH<sub>3</sub>]: the obtained NH<sub>3</sub> concentration,

V: the volume of electrolyte or absorber collecting NH<sub>3</sub>,

t: the time of reduction,

m<sub>cat</sub>: catalyst mass.

### **Determination of Faradaic efficiency (FE)**

Supposing three electrons were required to form an NH<sub>3</sub> molecule, FE could be gotten as follows:

$$FE = C_{\text{NH}_3} \times V \times N \times F / Q$$

Where

Q: quantity of electric charge connected by chronoamperometric test,

N: the number of electron transferred to form product (for NH<sub>3</sub> of 3),

F: Faraday constant, 96485 C mol<sup>-1</sup>,

C<sub>NH<sub>3</sub></sub>: NH<sub>3</sub> concentration measured,

V: the volume of electrolyte.

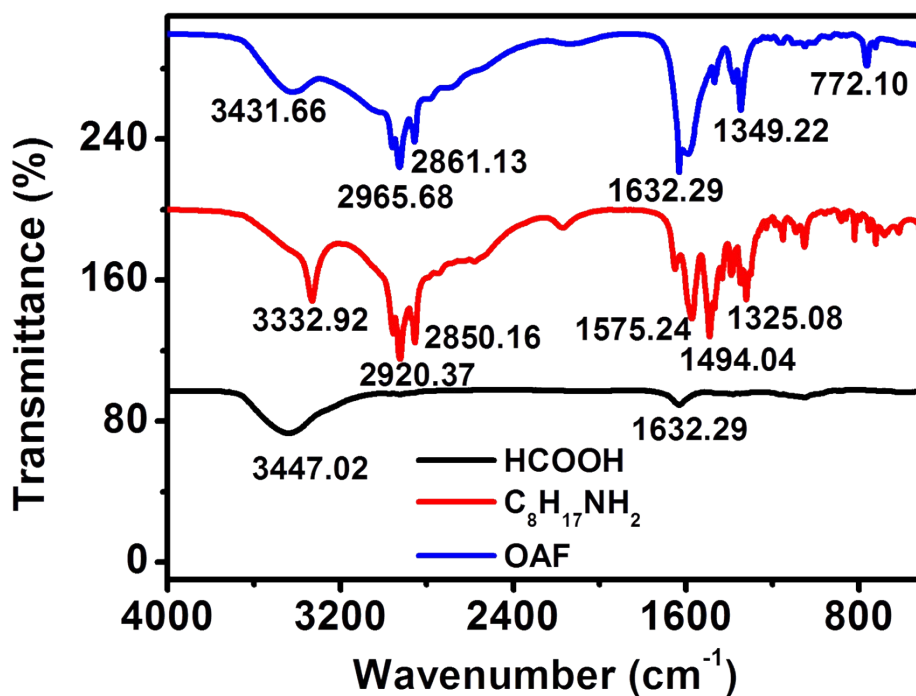

Fig. S1. FTIR spectra of the as-prepared ionic liquid *n*-octylammonium formate.

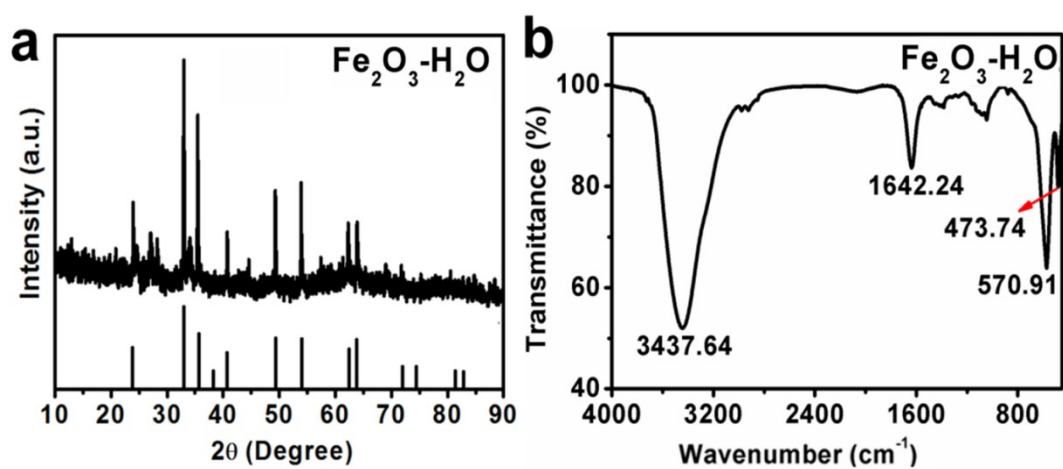

Fig. S2. XRD pattern (a) and FTIR spectrum (b) of Fe<sub>2</sub>O<sub>3</sub>-H<sub>2</sub>O.

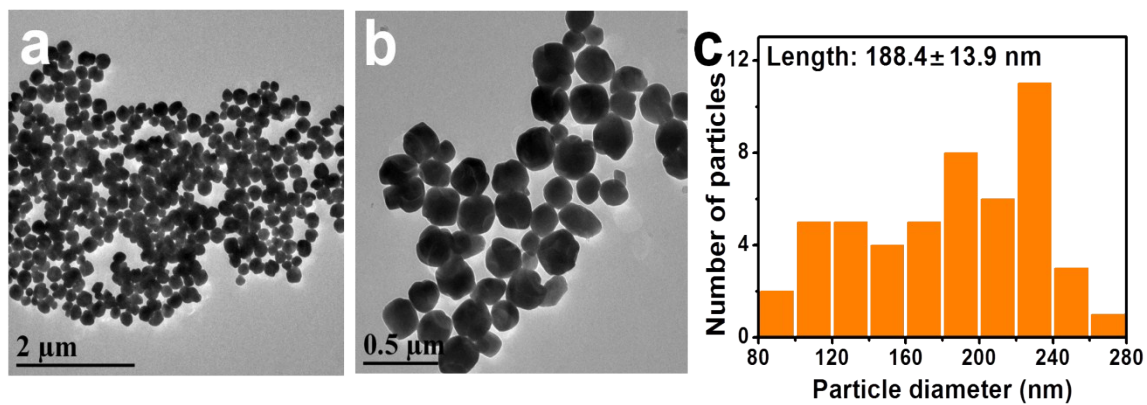

**Fig. S3.** The low- (a), high-magnification (b) TEM images and the particle size distribution (c) of  $\text{Fe}_2\text{O}_3\text{-H}_2\text{O}$ .

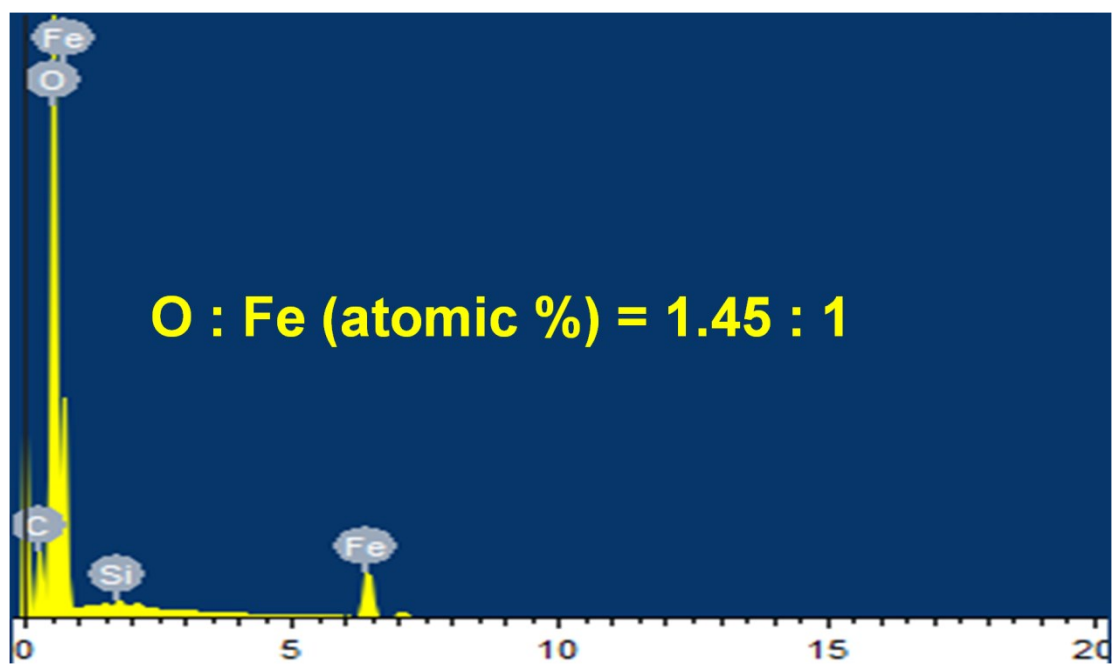

**Fig. S4.** EDX image of as-prepared  $\text{Fe}_2\text{O}_3\text{-IL}$  ( $\text{O} : \text{Fe} = 53.62 : 36.90$ ).



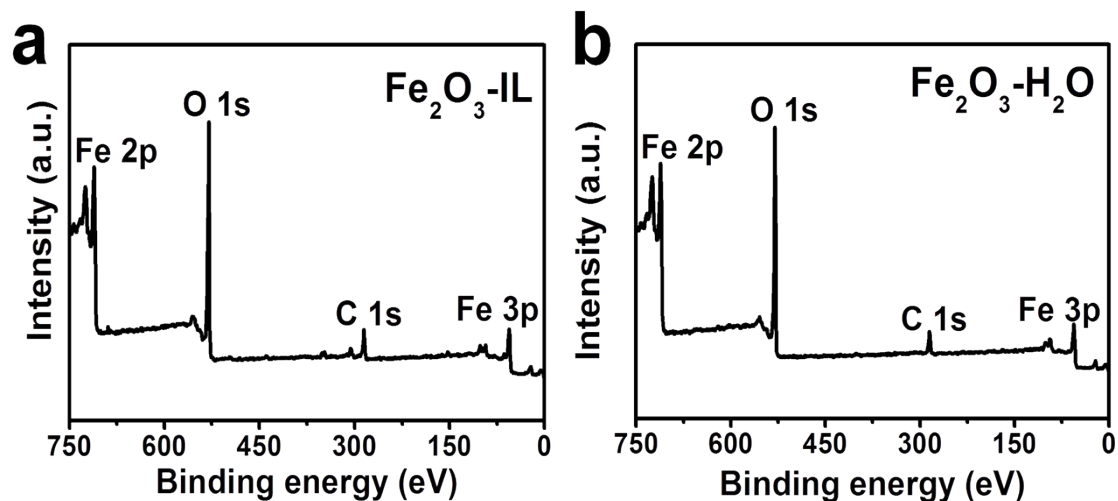

Fig. S5. XPS survey spectra of  $\text{Fe}_2\text{O}_3\text{-IL}$  (a) and  $\text{Fe}_2\text{O}_3\text{-H}_2\text{O}$  (b).

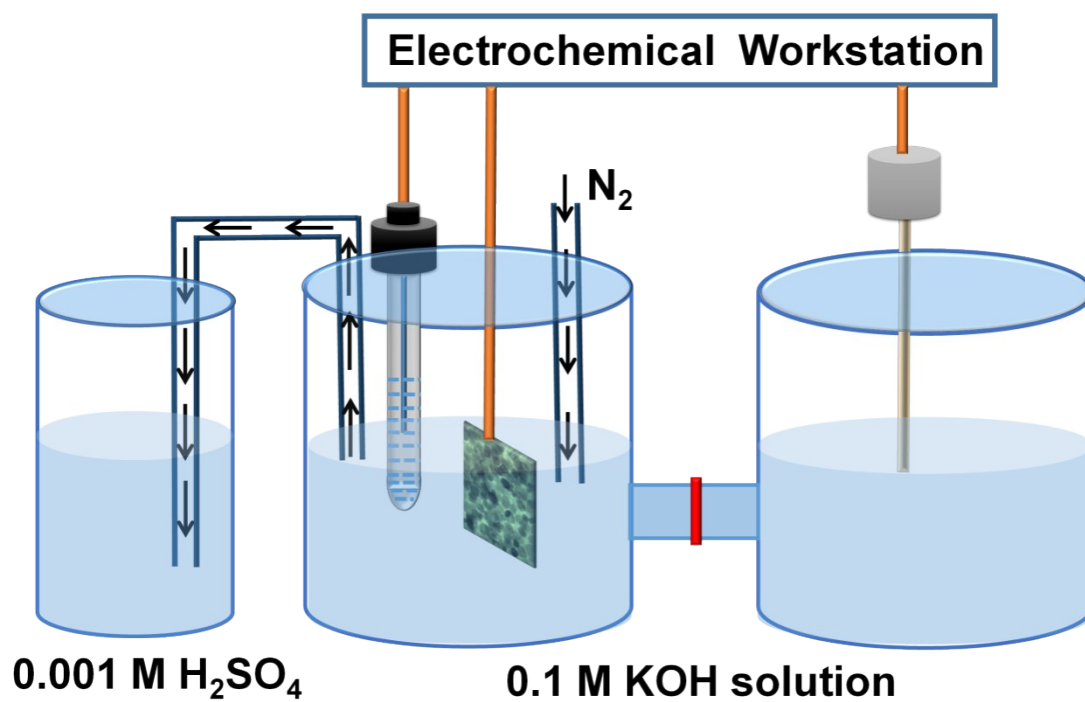

Fig. S6. The electrolytic device of alkaline electrolyte ( $0.1\text{ M KOH}$  solution).

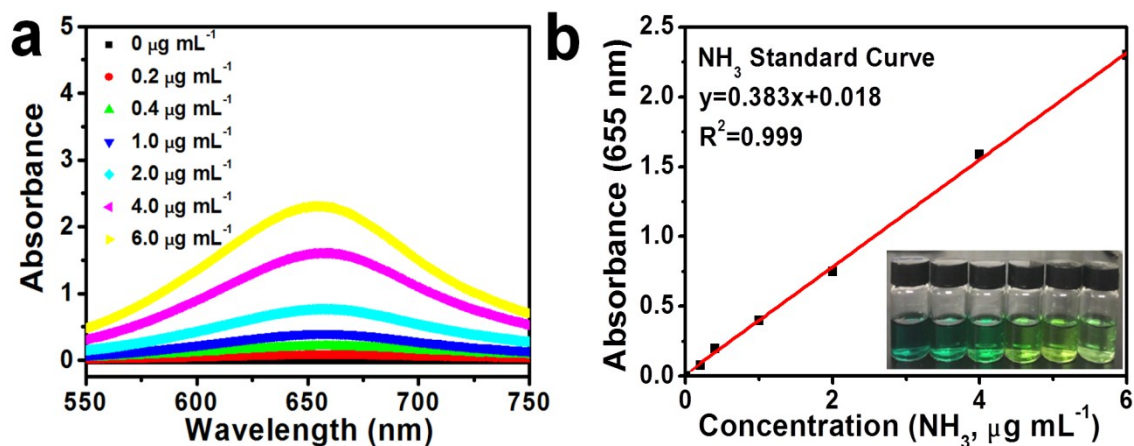

**Fig. S7.** In 0.1 M KOH electrolyte, the concentration-absorbance curve of  $\text{NH}_4^+$  with concentration of 0.0, 0.2, 0.4, 1.0, 2.0, 4.0 and 6.0  $\mu\text{g mL}^{-1}$  (a); calibration curve used for calculation of  $\text{NH}_3$  by  $\text{NH}_4^+$  concentration (b).

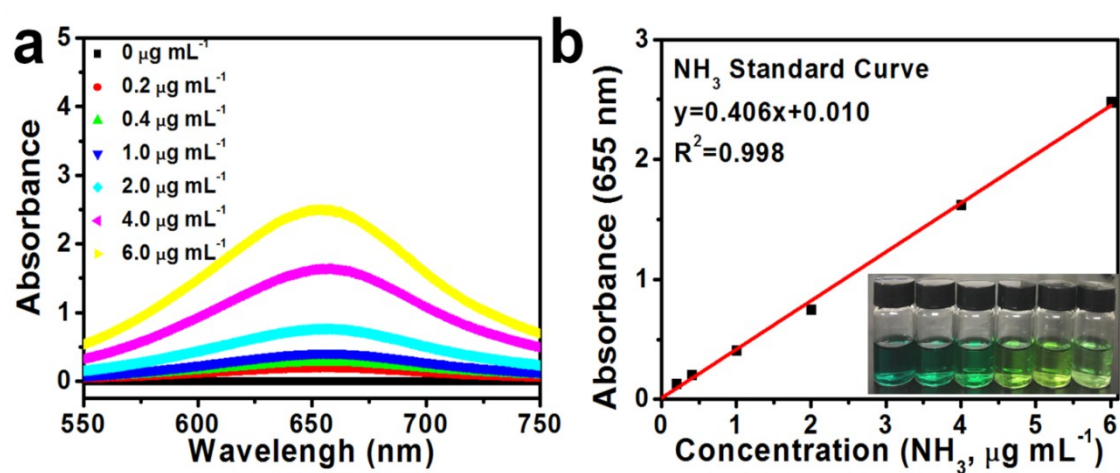

**Fig. S8.** In 0.001 M  $\text{H}_2\text{SO}_4$  absorber, the concentration-absorbance curve of  $\text{NH}_4^+$  with concentration of 0.0, 0.2, 0.4, 1.0, 2.0, 4.0 and 6.0  $\mu\text{g mL}^{-1}$  (a); calibration curve used for calculation of  $\text{NH}_3$  by  $\text{NH}_4^+$  concentration (b).

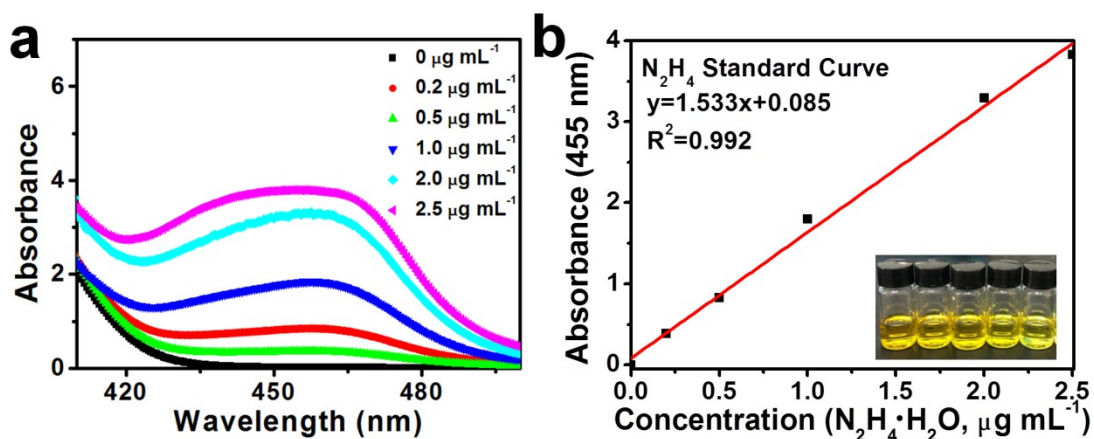

**Fig. S9.** In 0.1 M KOH electrolyte, the concentration-absorbance curve of  $N_2H_4$  with concentration of 0.0, 0.2, 0.5, 1.0, 2.0 and 2.5  $\mu g mL^{-1}$  (a); calibration curve used for calculation of  $N_2H_4$  concentration (b).

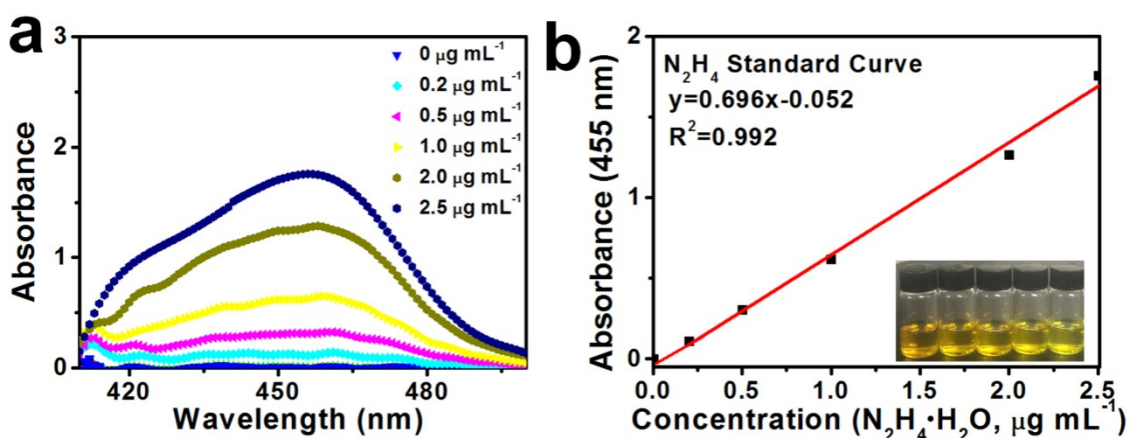

**Fig. S10.** In 0.001 M  $H_2SO_4$  absorber, the concentration-absorbance curve of  $N_2H_4$  with concentration of 0.0, 0.2, 0.5, 1.0, 2.0 and 2.5  $\mu g mL^{-1}$  (a); calibration curve used for calculation of  $N_2H_4$  concentration (b).

**Table S1.**  $NH_3$  formation rates and the corresponding Faradaic efficiencies (FEs) of  $Fe_2O_3$ -IL under various potentials in 0.1 M KOH electrolyte.

| Potential (V) | NH <sub>3</sub> formation rate<br>( $\mu\text{g h}^{-1} \text{mg}^{-1}_{\text{cat}}$ ) | NH <sub>3</sub> formation rate<br>( $\text{mol s}^{-1} \text{cm}^{-2}$ ) | FE (%) |
|---------------|----------------------------------------------------------------------------------------|--------------------------------------------------------------------------|--------|
| 0.0           | 8.55                                                                                   | $6.99 \times 10^{-11}$                                                   | 25.93  |
| -0.1          | 22.01                                                                                  | $1.80 \times 10^{-10}$                                                   | 20.34  |
| -0.2          | 19.40                                                                                  | $1.59 \times 10^{-10}$                                                   | 17.88  |
| -0.3          | 32.13                                                                                  | $2.62 \times 10^{-10}$                                                   | 6.63   |
| -0.4          | 30.61                                                                                  | $2.50 \times 10^{-10}$                                                   | 0.63   |
| -0.5          | 35.55                                                                                  | $2.91 \times 10^{-10}$                                                   | 0.27   |

**Table S2.** Comparison of NRR performance for the different catalysts at room temperature and ambient pressure.

| Catalyst                                      | Electrolyte                           | Potential<br>(V vs. RHE) | NH <sub>3</sub> formation rate                          | FE (%) | Ref. |
|-----------------------------------------------|---------------------------------------|--------------------------|---------------------------------------------------------|--------|------|
| $\gamma$ -Fe <sub>2</sub> O <sub>3</sub>      | 0.1 M KOH                             | 0.0                      | 0.212 $\mu\text{g h}^{-1} \text{mg}^{-1}_{\text{cat}}$  | 1.9    | 3    |
| Fe <sub>2</sub> O <sub>3</sub>                | 0.1 M Na <sub>2</sub> SO <sub>4</sub> | -0.8                     | 15.9 $\mu\text{g h}^{-1} \text{mg}^{-1}_{\text{cat}}$   | 0.94   | 4    |
| Fe <sub>3</sub> O <sub>4</sub> /Ti            | 0.1 M Na <sub>2</sub> SO <sub>4</sub> | -0.4                     | $5.6 \times 10^{-11} \text{mol s}^{-1} \text{cm}^{-2}$  | 2.6    | 5    |
| Fe/Fe <sub>3</sub> O <sub>4</sub>             | 0.1 M KOH                             | -0.3                     | $3.10 \times 10^{-12} \text{mol s}^{-1} \text{cm}^{-2}$ | 8.29   | 6    |
| Au                                            | 0.1 M KOH                             | -0.2                     | 1.648 $\mu\text{g h}^{-1} \text{cm}^{-2}$               | 3.88   | 7    |
| Rh                                            | 0.1 M KOH                             | -0.2                     | 23.88 $\mu\text{g h}^{-1} \text{mg}^{-1}_{\text{cat}}$  | 0.217  | 8    |
| MoS <sub>2</sub> /CC                          | 0.1 M Na <sub>2</sub> SO <sub>4</sub> | -0.5                     | $8.08 \times 10^{-11} \text{mol s}^{-1} \text{cm}^{-2}$ | 1.17   | 9    |
| Ti <sub>3</sub> C <sub>2</sub> T <sub>x</sub> | 0.5 M Li <sub>2</sub> SO <sub>4</sub> | -0.2                     | 0.26 $\mu\text{g h}^{-1} \text{mg}^{-1}_{\text{cat}}$   | 5.78   | 10   |
| TiO <sub>2</sub> /Ti                          | 0.1 M Na <sub>2</sub> SO <sub>4</sub> | -0.7                     | $9.16 \times 10^{-11} \text{mol s}^{-1} \text{cm}^{-2}$ | 2.5    | 11   |
| VN/Ti                                         | 0.1 M KOH                             | -0.5                     | $8.40 \times 10^{-11} \text{mol s}^{-1} \text{cm}^{-2}$ | 2.25   | 12   |
| NbO <sub>2</sub>                              | 0.05 M H <sub>2</sub> SO <sub>4</sub> | -0.6                     | 4.07 $\mu\text{g h}^{-1} \text{mg}^{-1}_{\text{cat}}$   | 32     | 13   |

|                                       |                                       |             |                                                                     |             |             |
|---------------------------------------|---------------------------------------|-------------|---------------------------------------------------------------------|-------------|-------------|
| NbO <sub>2</sub>                      | 0.05 M H <sub>2</sub> SO <sub>4</sub> | -0.65       | 11.6 μg h <sup>-1</sup> mg <sup>-1</sup> <sub>cat</sub>             | 19.7        | 13          |
| <b>Fe<sub>2</sub>O<sub>3</sub>-IL</b> | <b>0.1 M KOH</b>                      | <b>-0.3</b> | <b>32.13 μg h<sup>-1</sup> mg<sup>-1</sup><sub>cat</sub></b>        | <b>6.63</b> | <b>Our</b>  |
|                                       |                                       |             | <b>(2.62 × 10<sup>-10</sup> mol s<sup>-1</sup> cm<sup>-2</sup>)</b> |             | <b>work</b> |

2)

CNT = Carbon nanotube; CC = Carbon cloth

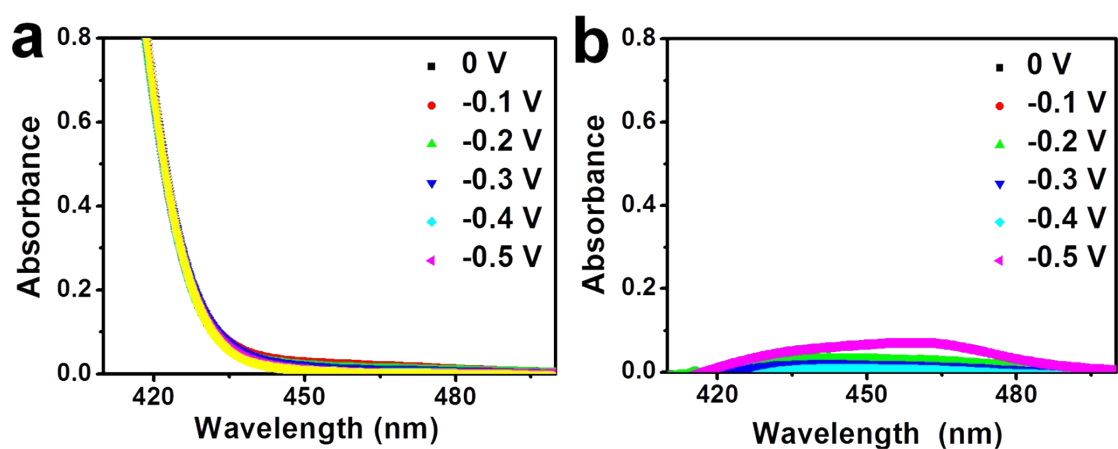

**Fig. S11.** The absorbance of hydrazine for Fe<sub>2</sub>O<sub>3</sub>-IL in 0.1 M KOH electrolyte (a) and 0.001 M H<sub>2</sub>SO<sub>4</sub> absorber (b) under different potentials.

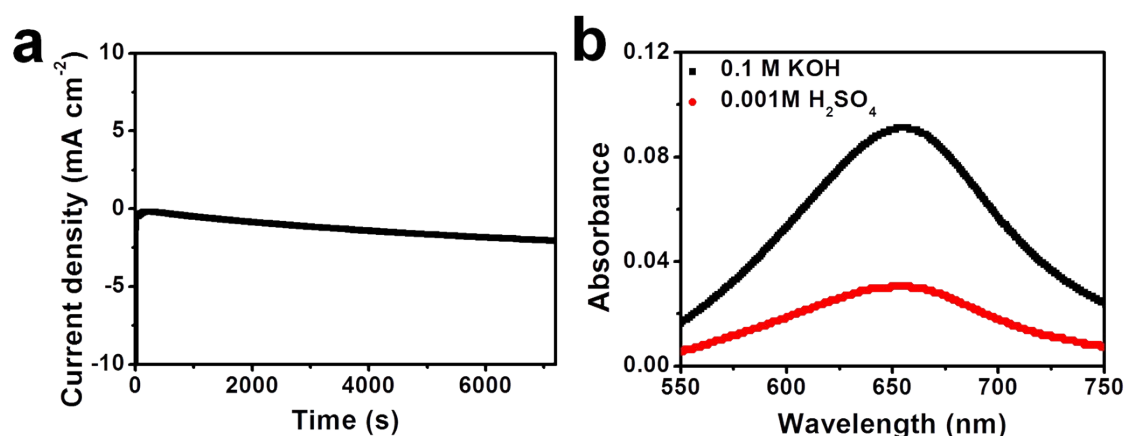

**Fig. S12.** The current density for Fe<sub>2</sub>O<sub>3</sub>-H<sub>2</sub>O with the time range of 2 h at -0.30 V vs. RHE in alkaline electrolyte (a); the absorbance in 0.1 M KOH electrolyte and 0.001

M H<sub>2</sub>SO<sub>4</sub> absorber (b).

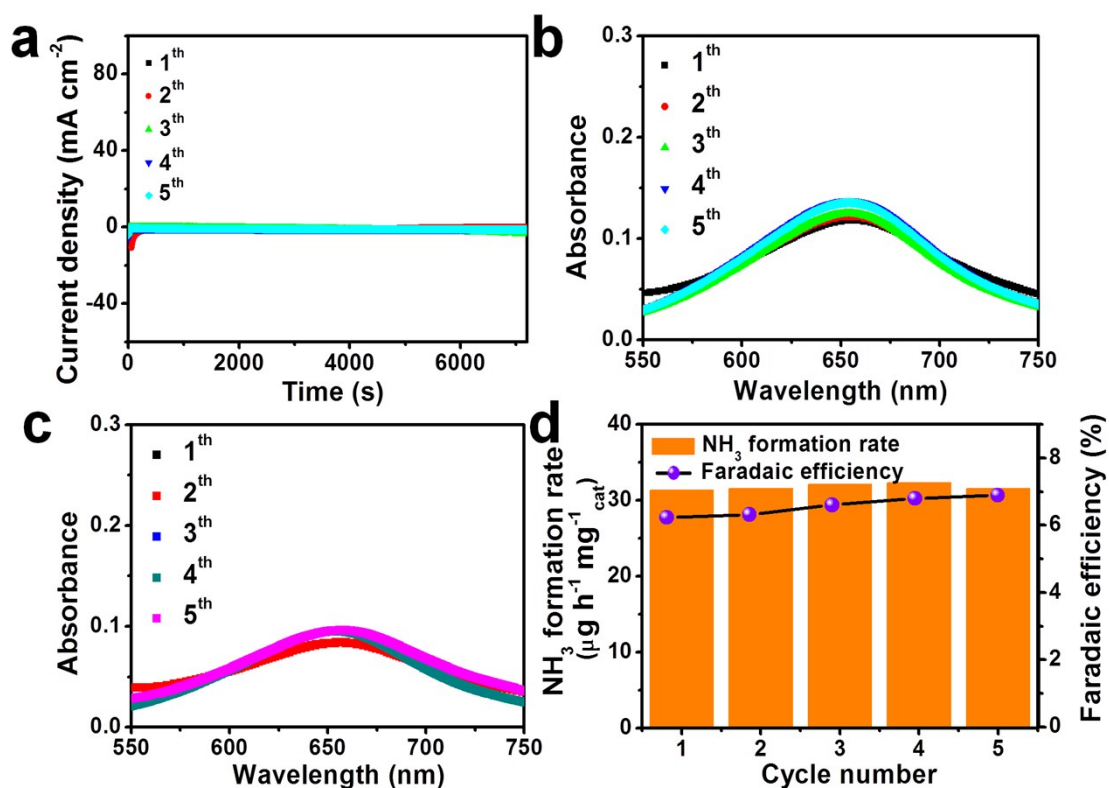

**Fig. S13.** The electrocatalytic stability of Fe<sub>2</sub>O<sub>3</sub>-IL at -0.30 V vs. RHE: the current densities under different cycles in alkaline electrolyte (a); absorbance under different cycles in 0.1 M KOH electrolyte (b); absorbance in 0.001 M H<sub>2</sub>SO<sub>4</sub> absorber (c); NH<sub>3</sub> formation rates and FEs under different cycles (d).

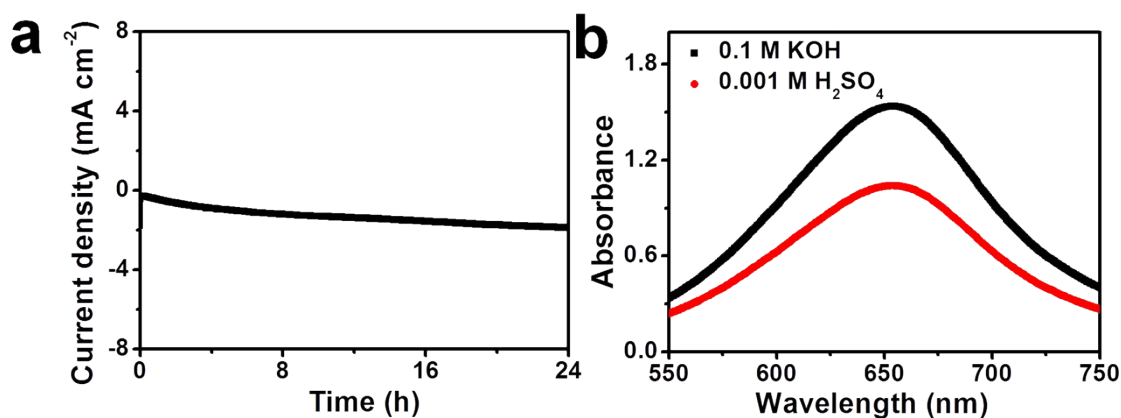

**Fig. S14.** Fe<sub>2</sub>O<sub>3</sub>-IL at -0.30 V vs. RHE: the corresponding of current density for 24 h

in alkaline electrolyte (a); the absorbance in 0.1 M KOH electrolyte and 0.001 M  $\text{H}_2\text{SO}_4$  absorber (b).

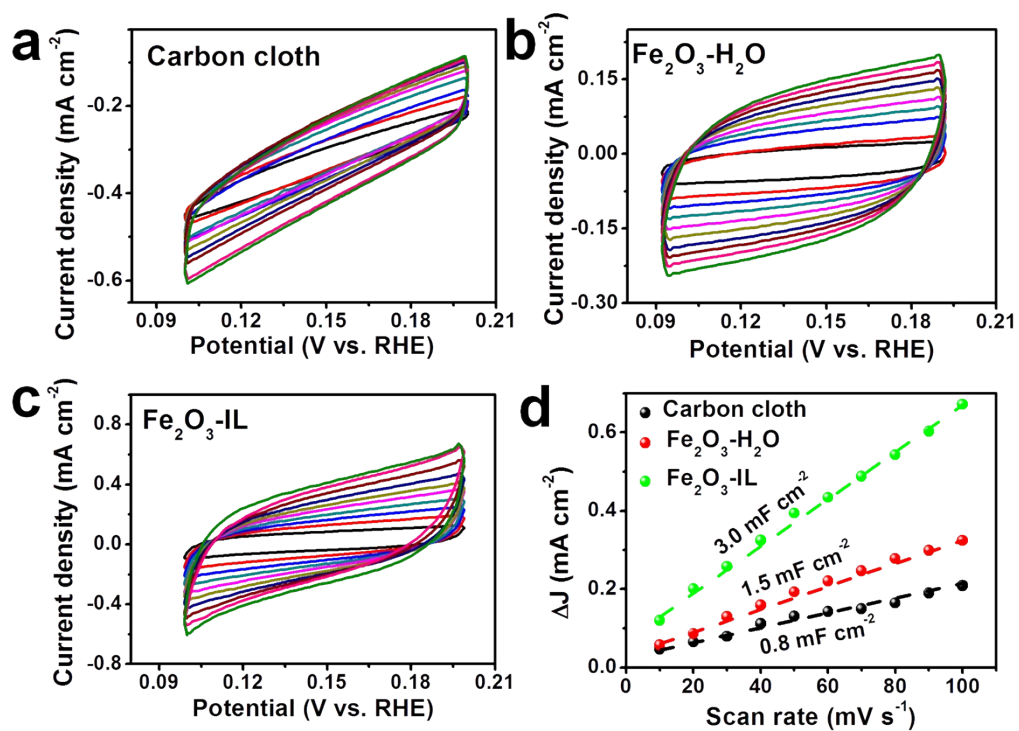

**Fig. S15.** Cyclic voltammograms at different scan rates of 10, 20, 30, 40, 50, 60, 70, 80, 90 and 100  $\text{mV s}^{-1}$  in 0.1 M KOH electrolyte: carbon cloth (a),  $\text{Fe}_2\text{O}_3\text{-H}_2\text{O}$  (b),  $\text{Fe}_2\text{O}_3\text{-IL}$  (c); the double-layer capacitance ( $C_{\text{dl}}$ ) (d).

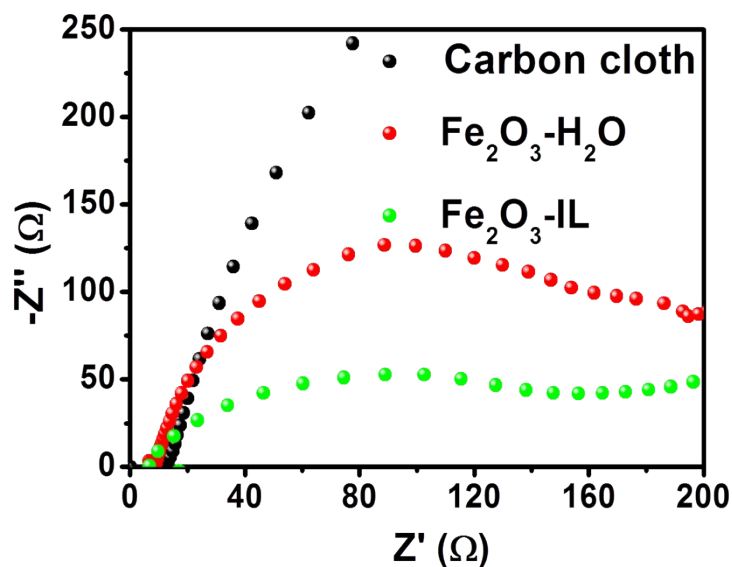

**Fig. S16.** Electrochemical impedance spectra (EIS) results of carbon cloth, Fe<sub>2</sub>O<sub>3</sub>-H<sub>2</sub>O and Fe<sub>2</sub>O<sub>3</sub>-IL in 0.1 M KOH electrolyte.

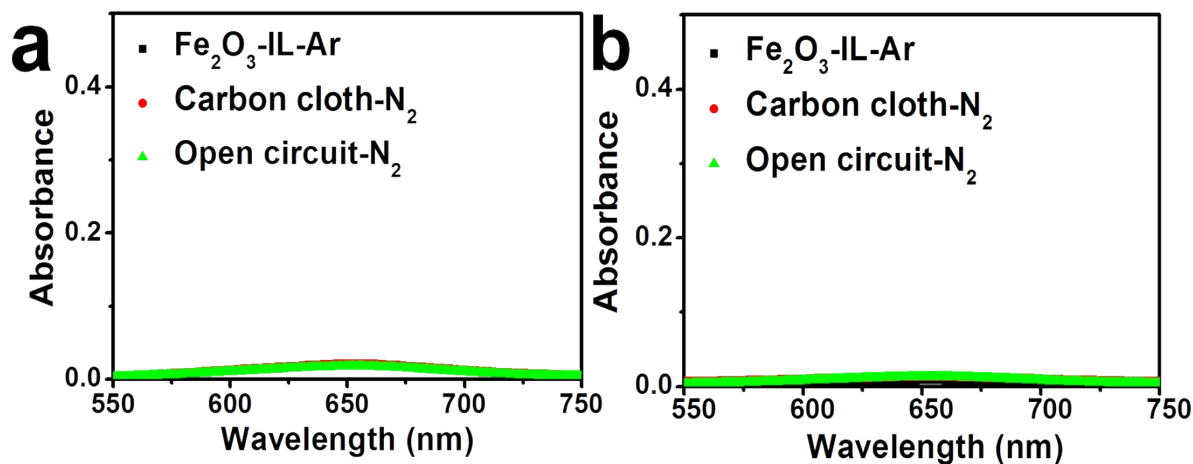

**Fig. S17.** Control experiments to verify the N source of the produced NH<sub>3</sub> at -0.30 V vs. RHE in 0.1 M KOH electrolyte (a) and in 0.001 M H<sub>2</sub>SO<sub>4</sub> absorber (b). No apparent NH<sub>3</sub> was detected for the electrolysis with Ar-saturated electrolyte (Fe<sub>2</sub>O<sub>3</sub>-IL-Ar), without the Fe<sub>2</sub>O<sub>3</sub>-IL catalyst (Carbon cloth-N<sub>2</sub>) and at the open circuit (Open circuit-N<sub>2</sub>).



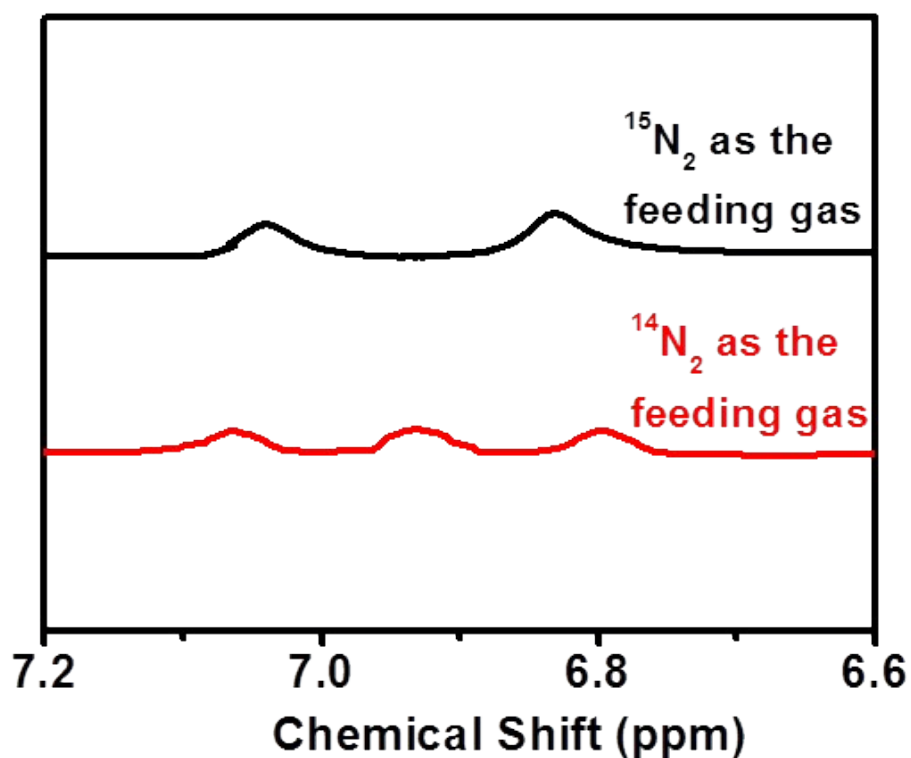

**Fig. S18.**  $^1\text{H}$  NMR spectra for the  $^{15}\text{NH}_4^+$  and  $^{14}\text{NH}_4^+$  after electrolysis of  $\text{Fe}_2\text{O}_3\text{-IL}$  using  $^{15}\text{N}_2$  and  $^{14}\text{N}_2$  as the feeding gas, respectively.

As illustrated in Fig. S18, a triplet coupling for  $^{14}\text{NH}_4^+$  and a doublet coupling for  $^{15}\text{NH}_4^+$  were shown in the  $^1\text{H}$  NMR spectra when used  $^{14}\text{N}_2$  and  $^{15}\text{N}_2$  as the feeding gas, respectively.  $^1\text{H}$  NMR spectra revealed that  $^{15}\text{N}_2$  as supplied gas only offered a doublet coupling of  $^{15}\text{NH}_4^+$ . It confirmed that  $\text{NH}_3$  originated from the electrocatalytic  $\text{N}_2$  reduction by  $\text{Fe}_2\text{O}_3\text{-IL}$ .

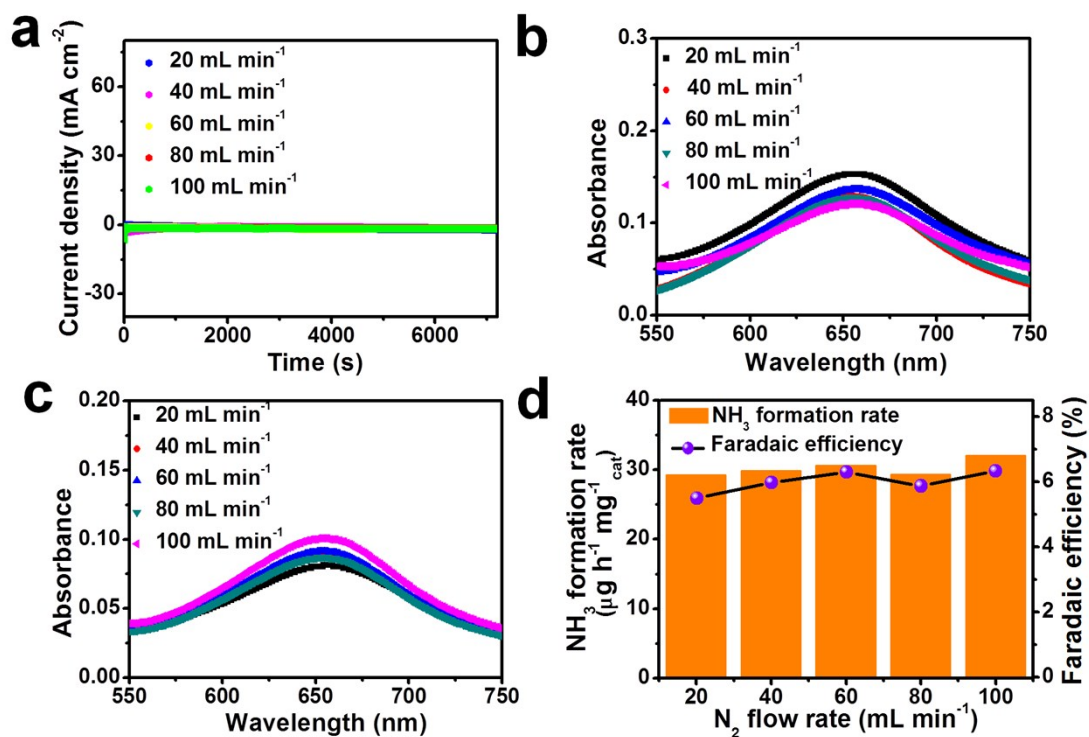

**Fig. S19.** Fe<sub>2</sub>O<sub>3</sub>-IL as catalyst at -0.30 V vs. RHE: the current densities under different nitrogen flow rates in 0.1 M KOH electrolyte (a); absorbance under different nitrogen flow rates in 0.1 M KOH electrolyte (b); absorbance in 0.001 M H<sub>2</sub>SO<sub>4</sub> absorber (c); NH<sub>3</sub> formation rates and FEs under different nitrogen flow rates in 0.1 M KOH electrolyte (d).

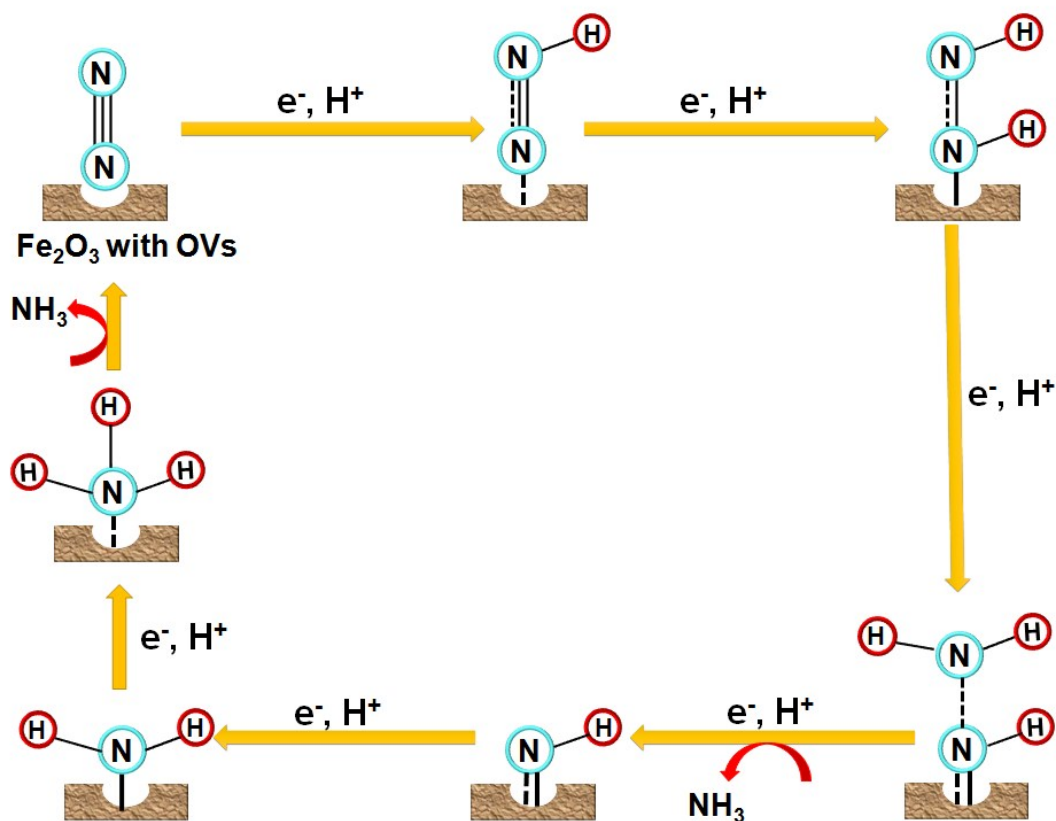

**Fig. S20.** Plausible mechanism of NRR catalyzed by hematite which has been proposed early by Nguyen *et al.*<sup>14</sup>

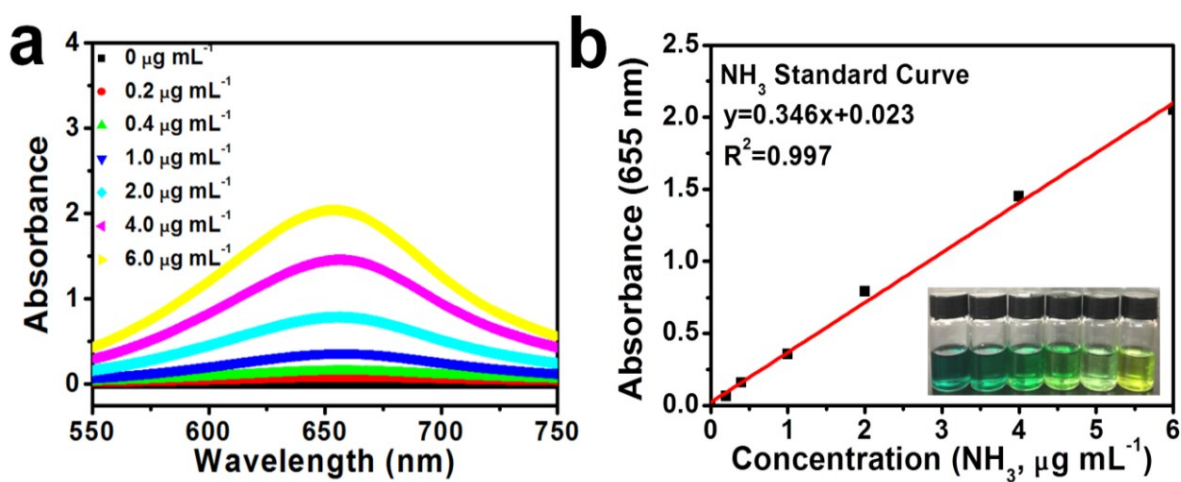

**Fig. S21.** In 0.1 M Na<sub>2</sub>SO<sub>4</sub> electrolyte, the concentration-absorbance curve of NH<sub>4</sub><sup>+</sup> with concentration of 0.0, 0.2, 0.4, 1.0, 2.0, 4.0 and 6.0 µg mL<sup>-1</sup> (a); calibration curve used for calculation of NH<sub>3</sub> by NH<sub>4</sub><sup>+</sup> concentration (b).

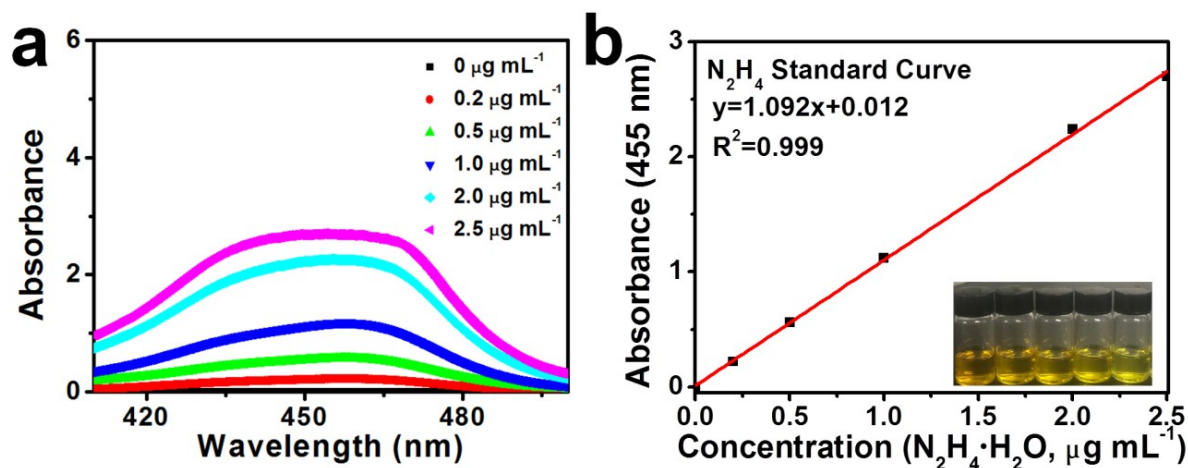

**Fig. S22.** In 0.1 M  $Na_2SO_4$  electrolyte: the concentration-absorbance curve of  $N_2H_4$  with concentration of 0.0, 0.2, 0.5, 1.0, 2.0 and 2.5  $\mu g mL^{-1}$  (a); calibration curve used for calculation of  $N_2H_4$  concentration (b).

**Table S3.**  $NH_3$  formation rates and the corresponding FEs of  $Fe_2O_3$ -IL under various potentials in 0.1 M  $Na_2SO_4$  electrolyte.

| Potential (V) | $NH_3$ formation rate<br>( $\mu g h^{-1} mg^{-1}_{cat}$ ) | $NH_3$ formation rate<br>( $mol s^{-1} cm^{-2}$ ) | FE (%) |
|---------------|-----------------------------------------------------------|---------------------------------------------------|--------|
| -0.4          | 3.21                                                      | $2.63 \times 10^{-11}$                            | 9.99   |
| -0.5          | 2.99                                                      | $2.45 \times 10^{-11}$                            | 3.91   |
| -0.6          | 3.32                                                      | $2.71 \times 10^{-11}$                            | 0.92   |
| -0.7          | 12.30                                                     | $1.00 \times 10^{-10}$                            | 0.81   |
| -0.8          | 24.81                                                     | $2.02 \times 10^{-10}$                            | 0.66   |
| -0.9          | 25.77                                                     | $2.11 \times 10^{-10}$                            | 0.20   |

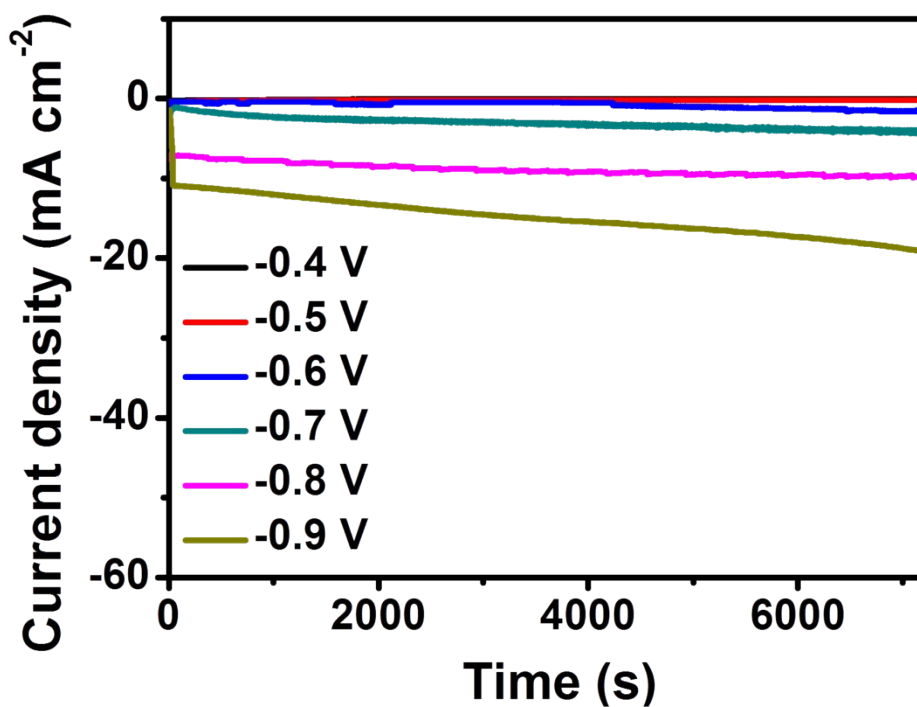

**Fig. S23.** The chronoamperometric test of Fe<sub>2</sub>O<sub>3</sub>-IL in 0.1 M Na<sub>2</sub>SO<sub>4</sub> under the potentials from -0.4 V to -0.9 V for 2 h.

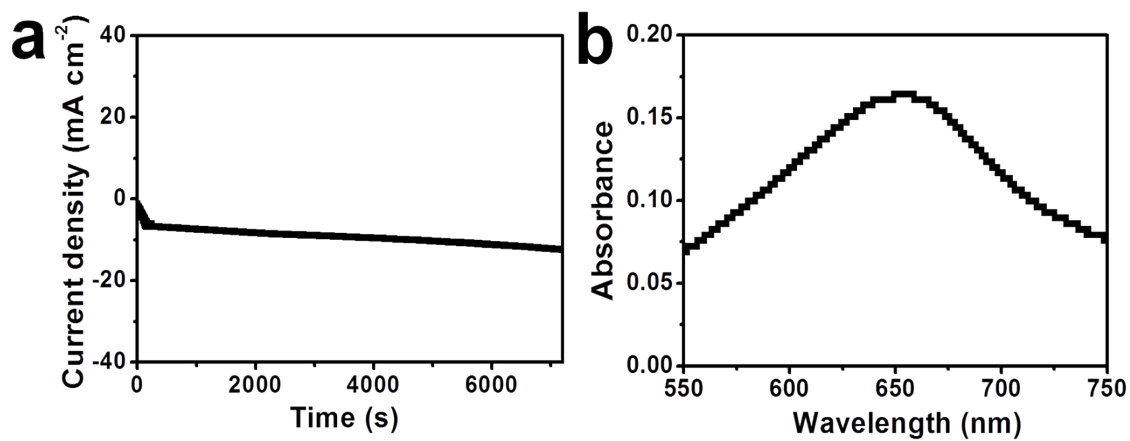

**Fig. S24.** Fe<sub>2</sub>O<sub>3</sub>-H<sub>2</sub>O as catalyst in 0.1 M Na<sub>2</sub>SO<sub>4</sub> electrolyte: the current densities at -0.8 V vs. RHE for 2 h (a); corresponding absorbance (b).

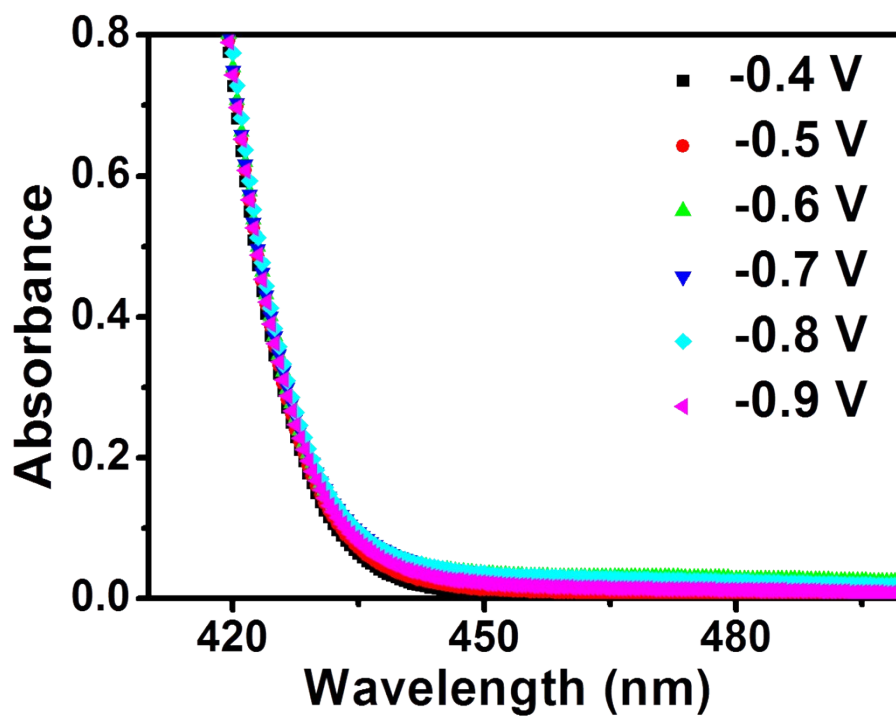

**Fig. S25.** The absorbance of hydrazine of Fe<sub>2</sub>O<sub>3</sub>-IL in 0.1 M Na<sub>2</sub>SO<sub>4</sub> electrolyte under different potentials.

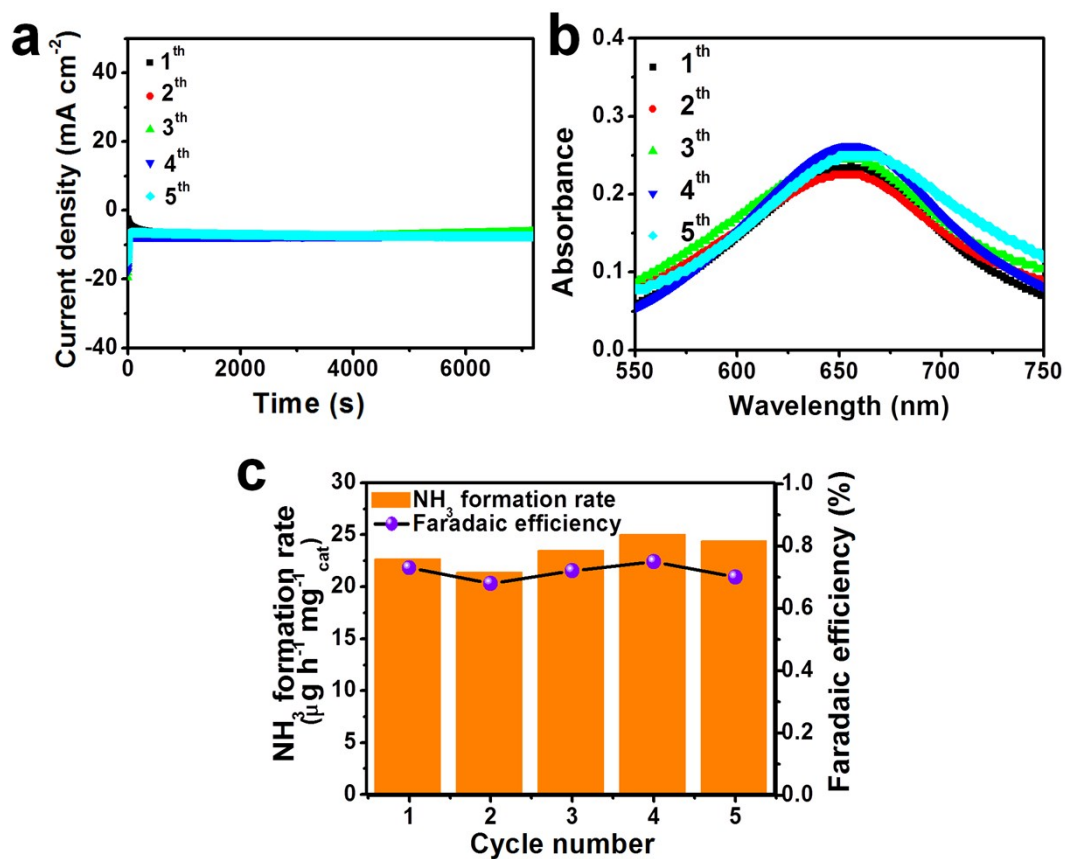

**Fig. S26.** Fe<sub>2</sub>O<sub>3</sub>-IL as catalyst: the electrocatalytic stability at -0.8 V vs. RHE in 0.1 M Na<sub>2</sub>SO<sub>4</sub> electrolyte under different cycles, the current densities (a); the UV-Vis absorbance (b); NH<sub>3</sub> formation rates and FEs (c).

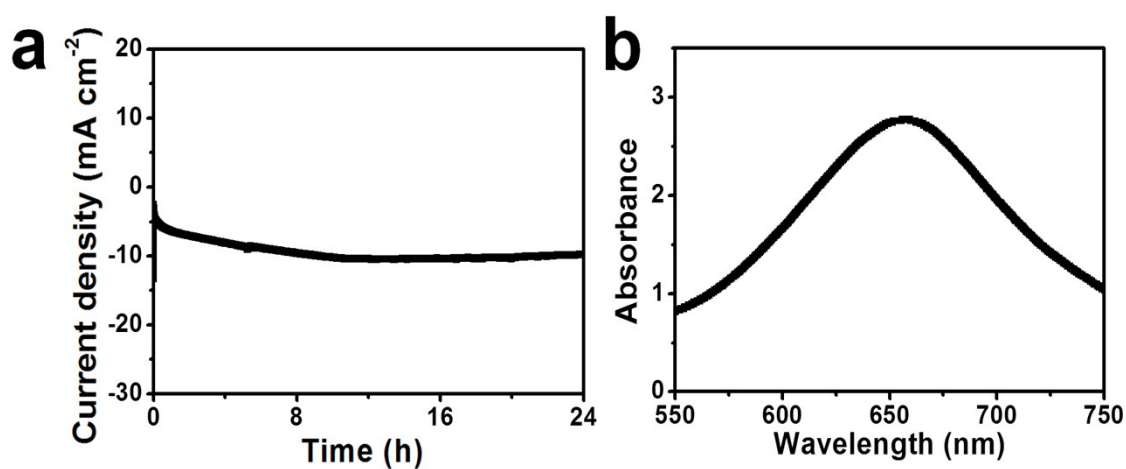

**Fig. S27.** Fe<sub>2</sub>O<sub>3</sub>-IL as catalyst in 0.1 M Na<sub>2</sub>SO<sub>4</sub> electrolyte: the current density at -0.8 V vs. RHE for 24 h (a) and corresponding absorbance (b).

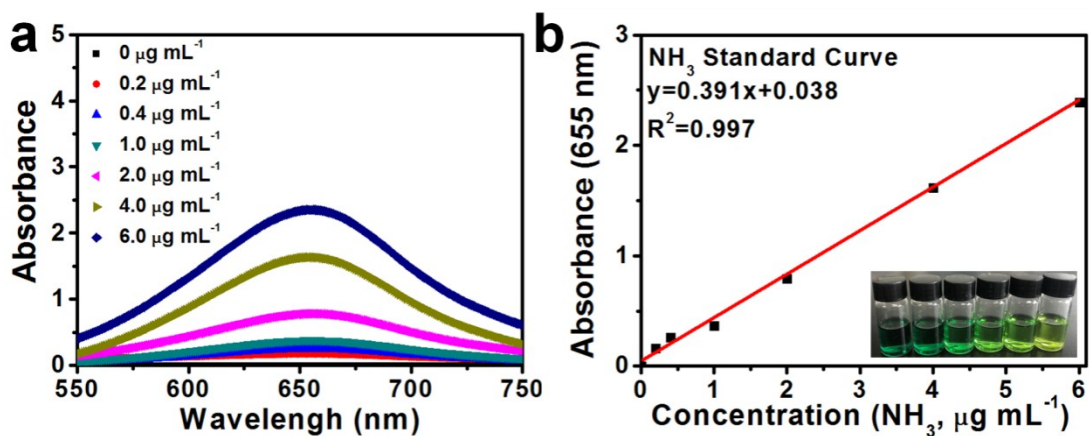

**Fig. S28.** In 0.001 M HCl electrolyte, the concentration-absorbance curve of  $\text{NH}_4^+$  with concentration of 0.0, 0.2, 0.4, 1.0, 2.0, 4.0 and 6.0  $\mu\text{g mL}^{-1}$  (a); calibration curve used for calculation of  $\text{NH}_3$  by  $\text{NH}_4^+$  concentration (b).

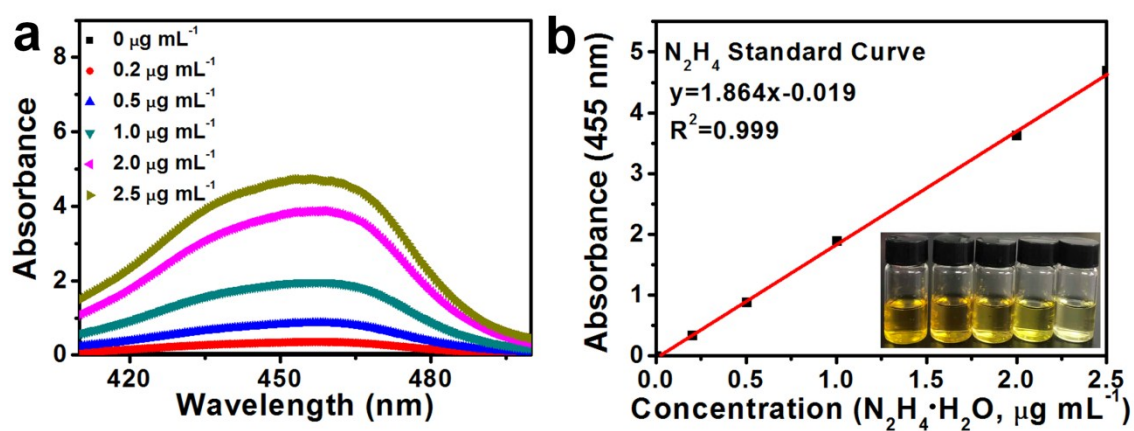

**Fig. S29.** In 0.001 M HCl electrolyte, the concentration-absorbance curve of  $\text{N}_2\text{H}_4$  with concentration of 0.0, 0.2, 0.5, 1.0, 2.0 and 2.5  $\mu\text{g mL}^{-1}$  (a); calibration curve used for calculation of  $\text{N}_2\text{H}_4$  concentration (b).



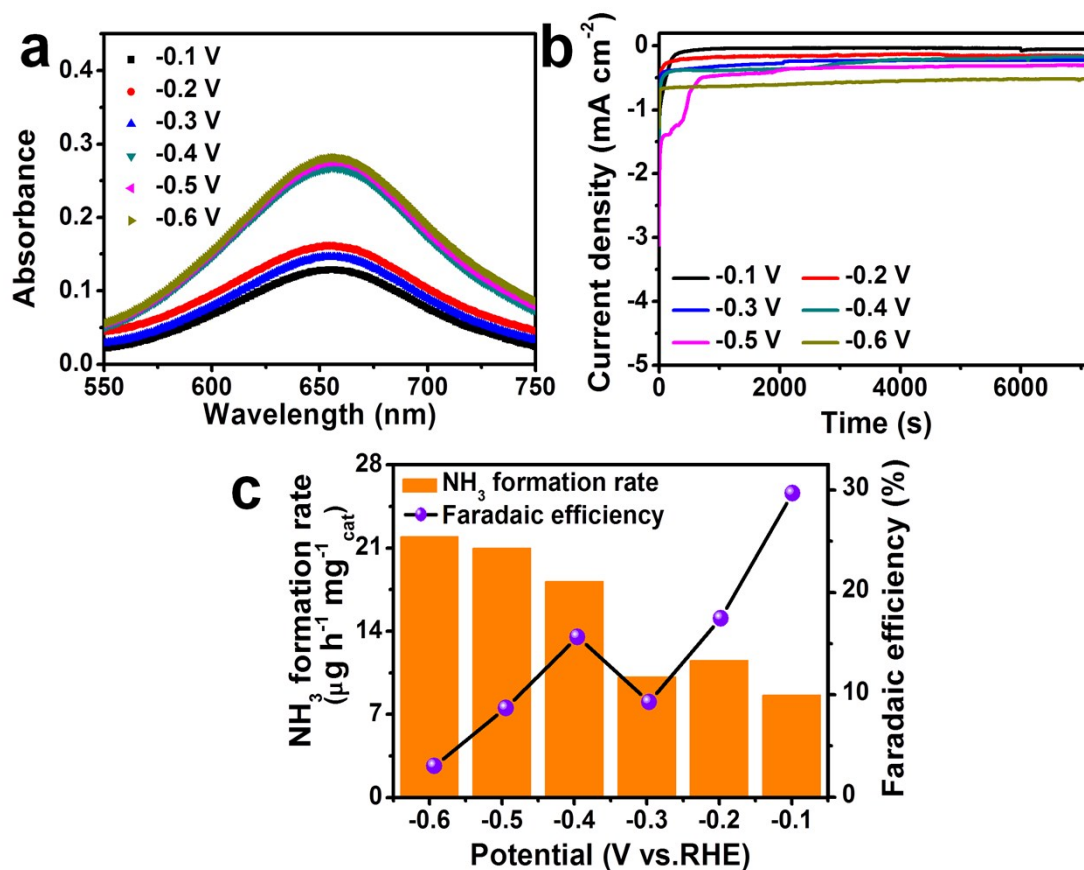

**Fig. S30.** Fe<sub>2</sub>O<sub>3</sub>-IL as catalyst in 0.001 M HCl electrolyte under the potentials from -0.1 V to -0.6 V for 2 h: UV-Vis absorption spectra of NH<sub>3</sub> in the electrolytes (a); the chronoamperometric test of Fe<sub>2</sub>O<sub>3</sub>-IL (b); NH<sub>3</sub> formation rates and FEs (c).

**Table S4.** NH<sub>3</sub> formation rates and the corresponding FEs of Fe<sub>2</sub>O<sub>3</sub>-IL under various potentials in 0.001 M HCl electrolyte.

| Potential (V) | NH <sub>3</sub> formation rate<br>(μg h <sup>-1</sup> mg <sup>-1</sup> <sub>cat</sub> ) | NH <sub>3</sub> formation rate<br>(mol s <sup>-1</sup> cm <sup>-2</sup> ) | FE (%) |
|---------------|-----------------------------------------------------------------------------------------|---------------------------------------------------------------------------|--------|
| -0.1          | 8.61                                                                                    | 7.03 × 10 <sup>-11</sup>                                                  | 29.68  |
| -0.2          | 11.54                                                                                   | 9.43 × 10 <sup>-11</sup>                                                  | 17.46  |
| -0.3          | 10.13                                                                                   | 8.28 × 10 <sup>-11</sup>                                                  | 9.29   |
| -0.4          | 18.17                                                                                   | 1.48 × 10 <sup>-10</sup>                                                  | 15.65  |
| -0.5          | 21.00                                                                                   | 1.72 × 10 <sup>-10</sup>                                                  | 8.70   |

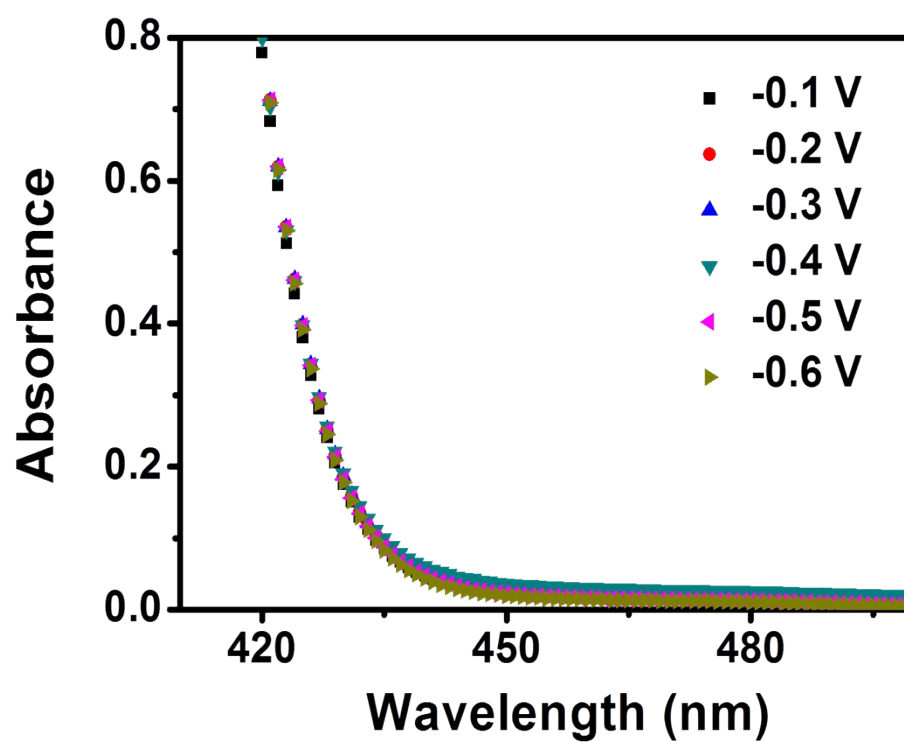

**Fig. S31.** The absorbance of hydrazine of Fe<sub>2</sub>O<sub>3</sub>-IL in 0.001 M HCl electrolyte under different potentials.

## References

- 1 F. Zhou, L. M. Azofra, M. Ali, M. Kar, A. N. Simonov, C. J. McDonnell-Worth, C. Sun, X. Zhang and D. MacFarlane, *Energy Environ. Sci.*, 2017, **10**, 2516-2520.
- 2 M. Shi, D. Bao, S. Li and B. Wulan, *Adv. Energy Mater.*, 2018, **8**, 1800124.
- 3 J. Kong, A. Lim, C. Yoon, J. Jang, H. Ham, J. Han, S. Nam, D. Kim, Y. Sung, J. Choi and H. S. Park, *ACS Sustainable Chem. Eng.*, 2017, **5**, 10986-10995.
- 4 X. Xiang, Z. Wang, X. Shi, M. Fan and X. Sun, *ChemCatChem*, 2018, **10**, 4530-4535.
- 5 Q. Liu, X. Zhang, Z. Bing, Y. Luo, G. Cui, F. Xie and X. Sun, *Nanoscale*, 2018, **10**, 14386-14389.
- 6 L. Hu, A. Khaniya, J. Wang, G. Chen, W. E. Kaden and X. Feng, *ACS Catal.*, 2018, **8**, 9312-9319.
- 7 D. Bao, Q. Zhang, F. Meng, H. Zhong, M. Shi, Y. Zhang, J. Yan, Q. Jiang and X. Zhang, *Adv. Mater.*, 2017, **29**, 1604799.
- 8 H. Liu, S. Han, Y. Zhao, Y. Zhu, X. Tian, J. Zeng, J. Jiang, B. Xia, and Y. Chen, *J. Mater. Chem. A*, 2018, **6**, 3211-3217.
- 9 L. Zhang, X. Ji, X. Ren, Y. Ma, X. Shi, Z. Tian, A. M. Asiri, L. Chen, B. Tang and X. Sun, *Adv. Mater.*, 2018, **30**, 1800191.
- 10 Y. Luo, G. Chen, L. Ding, X. Chen, L. Ding and H. Wang, *Joule*, 2019, **3**, 1-11.
- 11 R. Zhang, X. Ren, X. Shi, F. Xie, B. Zheng, X. Guo and X. Sun, *ACS Appl. Mater. Interfaces*, 2018, **10**, 28251-28255.

- 12 R. Zhang, Y. Zhang, X. Ren, Y. Luo and X. P. Sun, *ACS Sustainable Chem. Eng.*, 2018, **6**, 9545-9549.
- 13 L. Huang, J. Wu, P. Han, A. M. Al-Enizi, T. M. Almutairi, L. Zhang and G. Zheng, *Small Methods*, 2018, **2**, 1800386.
- 14 M. T. Nguyen, N. Seriani and R. Gebauer, *Phys. Chem. Chem. Phys.*, 2014, **17**, 14317-14322.
